# Supplementary material for: Bridging the gap – estimation of 2022/2023 SARS-CoV-2 healthcare burden in Germany based on multidimensional data from a rapid epidemic panel
Source: bioRxiv or medRxiv preprint supplement (doi:10.1101/2022.12.30.22284061), 2022-12-30

# Supporting Information

MuSPAD sampling/survey period:

The blood sampling period took place from June 6th, 2022 to July 3rd, 2022. We chose three existing MuSPAD study sites: City Region Aachen (around 560,000 inhabitants), Magdeburg (around 236,000 inhabitants) and Hannover (around 536,000 inhabitants). From June 2022 on, we send out our online and paper-based survey to all established MuSPAD participants (Freiburg, Reutlingen, Chemnitz, Greifswald, Magdeburg, Hannover, Aachen, and Osnabrück).

Lab analysis:

The serum samples obtained were analyzed centrally at the Institutes of Clinical Chemistry and Laboratory Medicine in Oldenburg and Greifswald. The Elecsys® Anti-SARS-CoV-2 S and Elecsys® Anti-SARS-CoV-2 NC (both Roche Diagnostics, Mannheim, Germany) were used for the determination of the quantitative antibody response against the S and N antigen of SARS-CoV-2. For Nucleocapsid (NC) protein we used  $\geq 0.8$  BAU/ml cut-offs for seropositivity. We also performed SARS-CoV-2 specific interferon-gamma release response (IGRA) using SARS-CoV-2 LIASION QuantiFERON-TB Gold Plus Qiagen®. For the blood collection, we used Lithium-Heparin Monovette and transferred them into specialized QFT-Plus Blood Collection with 24 h. We incubated the samples for 16 to 24 hours at 37°C, centrifuged the tubes at 2000 to 3000 RZB (g) for 15 minutes. Subsequently we detected released IFN $\gamma$  in harvested plasma by ELISA.

For the neutralization assay, we investigate the activity of heat-inactivated (56°C) serum against lentivirus (HIV)-based pseudoviruses. Our assay is a further development of the protocol of Crawford et al.<sup>25</sup>. In the methodology used, it was first described by us in the paper by Vanshylla et al.<sup>24</sup>. For our serum samples, the 50% inhibitory serum dilution (ID50) was tested against pseudoviruses with the spike protein of the Wu01 variant and the BA.4/5 variant. Samples were tested in a 1:3 dilution series at dilutions ranging from 1:10 to 1:21,870 - this is within the quantification range of the assay.

**Supplementary Table S1: Protection against severe course of disease and infection in adults for different combinations of vaccination and infection with the Omicron variant<sup>1</sup>**

| <b>Exposures</b> | <b>VE<sup>2</sup></b>                 | <b>VE in studies without information on follow-up</b> | <b>VE 0-13 days</b> | <b>VE 14-90 days</b> | <b>VE 91-180 days</b> | <b>VE &gt;180 days</b> |
|------------------|---------------------------------------|-------------------------------------------------------|---------------------|----------------------|-----------------------|------------------------|
| 4 Exposures      | Infection <sup>3</sup>                | 46-96% (n=6)                                          | 36% (n=1)           | 88-98% (n=2)         | 72-96% (n=2)          | 82% (n=1)              |
|                  | Severe course of disease <sup>4</sup> | 68-97% (n=4)                                          |                     |                      |                       |                        |
|                  | Death                                 | 81% (n=1)                                             |                     |                      |                       |                        |
| 3 Exposures      | Infection <sup>3</sup>                | 35-78% (n=13)                                         | 18-69% (n=8)        | 32-89% (n=14)        | 5-96% (n=10)          | 34-68% (n=3)           |
|                  | Severe course of disease <sup>4</sup> | 34-99%, AZ 30% (n=9)                                  | 65-95% (n=3)        | 59-97% (n=10)        | 52-95% (n=10)         | 65% (n=1)              |
|                  | Death                                 | 66-98% (n=2)                                          | 71-86% (n=1)        | 82-86% (n=2)         | 87% (n=1)             | 77% (n=1)              |
| 1-2 Exposures    | Infection <sup>3</sup>                | -6-90% (n=17)                                         | 10-23% (n=2)        | 12-82% (n=16)        | 3-70% (n=15)          | -13-56% (n=9)          |
|                  | Severe course of disease <sup>4</sup> | 41-97% (n=10)                                         | 28-46% (n=1)        | 42-96% (n=10)        | 22-91% (n=14)         | 12-88% (n=6)           |
|                  | Death                                 | 66-90% (n=3)                                          | -9-29% (n=2)        | 60-62% (n=2)         | 57-70% (n=1)          | 49-57% (n=2)           |

<sup>1</sup> Interims analysis (see <https://zenodo.org/record/7177592#.Y4okYnbMI2w>) based on 27 identified studies from View hub on 9/27/2022; International Vaccine Access Center, Johns Hopkins Bloomberg School of Public Health, World Health Organization, Coalition for Epidemic Preparedness Innovations. Results of COVID-19 Vaccine Effectiveness Studies: An Ongoing Systematic Review: Weekly Summary Tables. Updated September 22, 2022. Available from: URL: [https://view-hub.org/sites/default/files/2022-09/COVID19\\_Vaccine\\_Effectiveness\\_Transmission\\_Studies\\_Summary\\_Tables\\_20220922.pdf](https://view-hub.org/sites/default/files/2022-09/COVID19_Vaccine_Effectiveness_Transmission_Studies_Summary_Tables_20220922.pdf).

<sup>2</sup> VE Vaccine effectiveness (reference: no vaccination, infection, or antibodies); range of point estimates of the included studies

<sup>3</sup> Definitions included every, symptomatic, or documented infection

<sup>4</sup> Definitions included hospitalization, admission on intensive care unit, and/or death

**Supplementary Table S2:** Combined endpoint in those with and without IGRA Age distribution of the MuSPAD participants with blood samples grouped by combined endpoints including IGRA test results

| Age groups in years                                                                             | 18-34<br>n (%)        | 35-49<br>n (%)          | 50-64<br>n (%)         | 65-79<br>n (%)         | 80+<br>n (%)          | Overall<br>n (%) <sup>1</sup> |
|-------------------------------------------------------------------------------------------------|-----------------------|-------------------------|------------------------|------------------------|-----------------------|-------------------------------|
| <b>Combined endpoints in those with blood sampling n=2898</b>                                   |                       |                         |                        |                        |                       |                               |
| 3 exposures + one in 2022                                                                       | 85 (31.1%)            | 168 (35.1%)             | 297 (26.0%)            | 372 (42.7%)            | 69 (51.5%)            | 991 (34.2%)                   |
| 3 exposures                                                                                     | 170 (62.3%)           | 275 (57.5%)             | 786 (68.9%)            | 481 (55.2%)            | 63 (47.0%)            | 1775 (61.2%)                  |
| 1-3 exposures, or no immune correlates                                                          | 18 (6.6%)             | 34 (7.1%)               | 51 (4.5%)              | 15 (1.7%)              | 1 (0.7%)              | 119 (4.1%)                    |
| 0 exposures, no immune correlates                                                               | 0 (0%)                | 1 (0.2%)                | 7 (0.6%)               | 4 (0.5%)               | 1 (0.7%)              | 13 (0.4%)                     |
| <b>Total</b>                                                                                    | <b>273</b>            | <b>478</b>              | <b>1141</b>            | <b>872</b>             | <b>134</b>            | <b>2898</b>                   |
| <b>Combined endpoint including IGRA result in those with IGRA* sampling n=973<sup>1,2</sup></b> |                       |                         |                        |                        |                       |                               |
| 3 exposures + one in 2022 (n; %IGRA negative)                                                   | 33; 27.0% (5; 2%)     | 58; 31.2%; (5; 8.6%)    | 60; 19.5% (9; 15.0%)   | 101; 36.9% (31; 30.7%) | 38; 23.6% (21; 55.3%) | 290, 29.8% (71; 24.5%)        |
| 3 exposures (n; % IGRA negative)                                                                | 81; 66.4% (21; 25.9%) | 103; 55.4%; (24; 23.3%) | 224; 73.0% (68; 30.4%) | 168; 61.3% (90; 53.6%) | 45; 28.0% (25; 55.6%) | 621; 63.8% (228; 36.7%)       |
| 1-3 exposures, or no immune correlates (n; % IGRA negative)                                     | 8; 6.6% (6; 75.0%)    | 24; 12.9% (12; 50.0%)   | 21; 6.8% (8; 38.1%)    | 3; 1.1% (1; 33.3%)     | 0                     | 56; 5.8% (27; 48.2%)          |
| 0 exposures, no immune correlates (n; % IGRA negative)                                          | 0                     | 1; 0.5% (1; 100%)       | 2; 0.7% (2; 100%)      | 2; 0.7% (2; 100%)      | 1; 0.6% (100%)        | 6; 0.6% (6; 100%)             |
| <b>Total</b>                                                                                    | <b>122</b>            | <b>186</b>              | <b>307</b>             | <b>274</b>             | <b>84</b>             | <b>973</b>                    |

\*IGRA= interferon-gamma release response; <sup>1</sup>43 participants did not specify age; <sup>2</sup>62 participants did not indicate a combined endpoint

**Supplementary Table S3:** Parametrization of the combined endpoints with and without humoral immune correlations as well as positive or negative IGRA based on literature synthesis

| Groups of combined endpoints                       | Vaccination/Infection/Immunity                                                                                                                                 | Parametrization of models                                                            | Protection vs symptomatic infection for fully protected | Protection vs hospitalization for fully protected | Protection vs ICU* for fully protected |
|----------------------------------------------------|----------------------------------------------------------------------------------------------------------------------------------------------------------------|--------------------------------------------------------------------------------------|---------------------------------------------------------|---------------------------------------------------|----------------------------------------|
| Group I<br>3 + 1 exposure in 2022                  | 3 exposures (vaccination or infection) with humoral immune correlates* + one infection/vaccination in 2022                                                     | Probably high protection vs severe course of disease<br>Some protection vs infection | 40-60%                                                  | 70-90%                                            | 70-90%                                 |
| Group II<br>3 exposures                            | 3 exposures (vaccination or infection) with humoral immune correlates*                                                                                         | Moderate protection vs severe course of disease<br>Some protection vs infection      | 10-30%                                                  | 50-70%                                            | 50-70%                                 |
| Group III<br>1-3 exposures or no immune correlates | 3 or more exposures without immune correlate, 1-2 exposures with or without immune correlate or 0 exposures with at least 1 positive humoral immune correlate* | Some protection vs severe course of disease<br>Little protection vs infection        | 0                                                       | 20-40%                                            | 20-40%                                 |

\*ICU= intensive care unit

**Supplementary Figure S1:** Scatterplot of correlation between anti-S by two variants Wu01 and BA.5 (A, B) and anti-NC antibody titers (C, D) based on ELISA test and neutralization

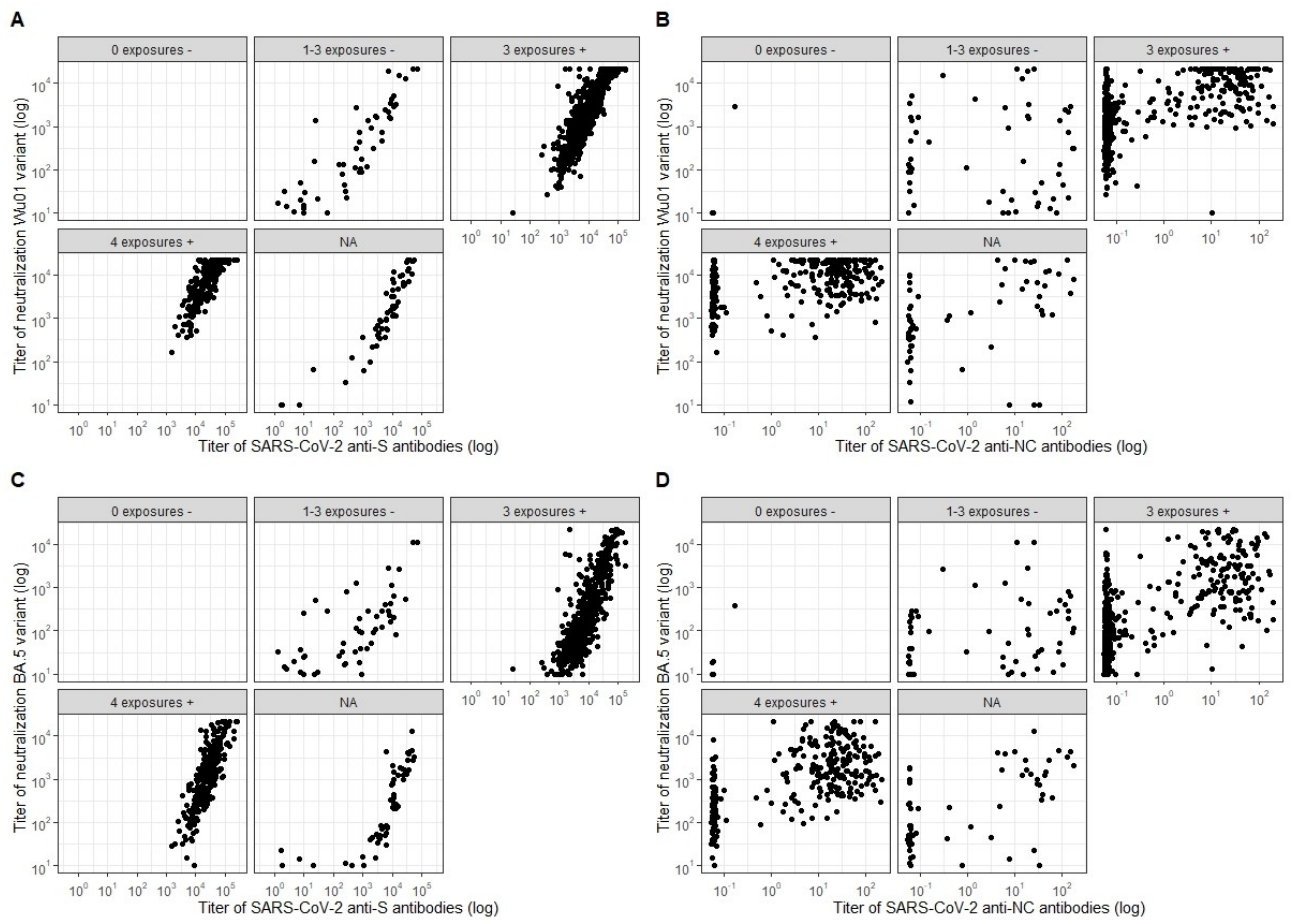

**Supplementary Figure S2:** Boxplot of BA.5 neutralizing antibody response by time since last SARS CoV-2 vaccination **(a)** and last SARS-CoV-2 infection **(b)** stratified by IGRA

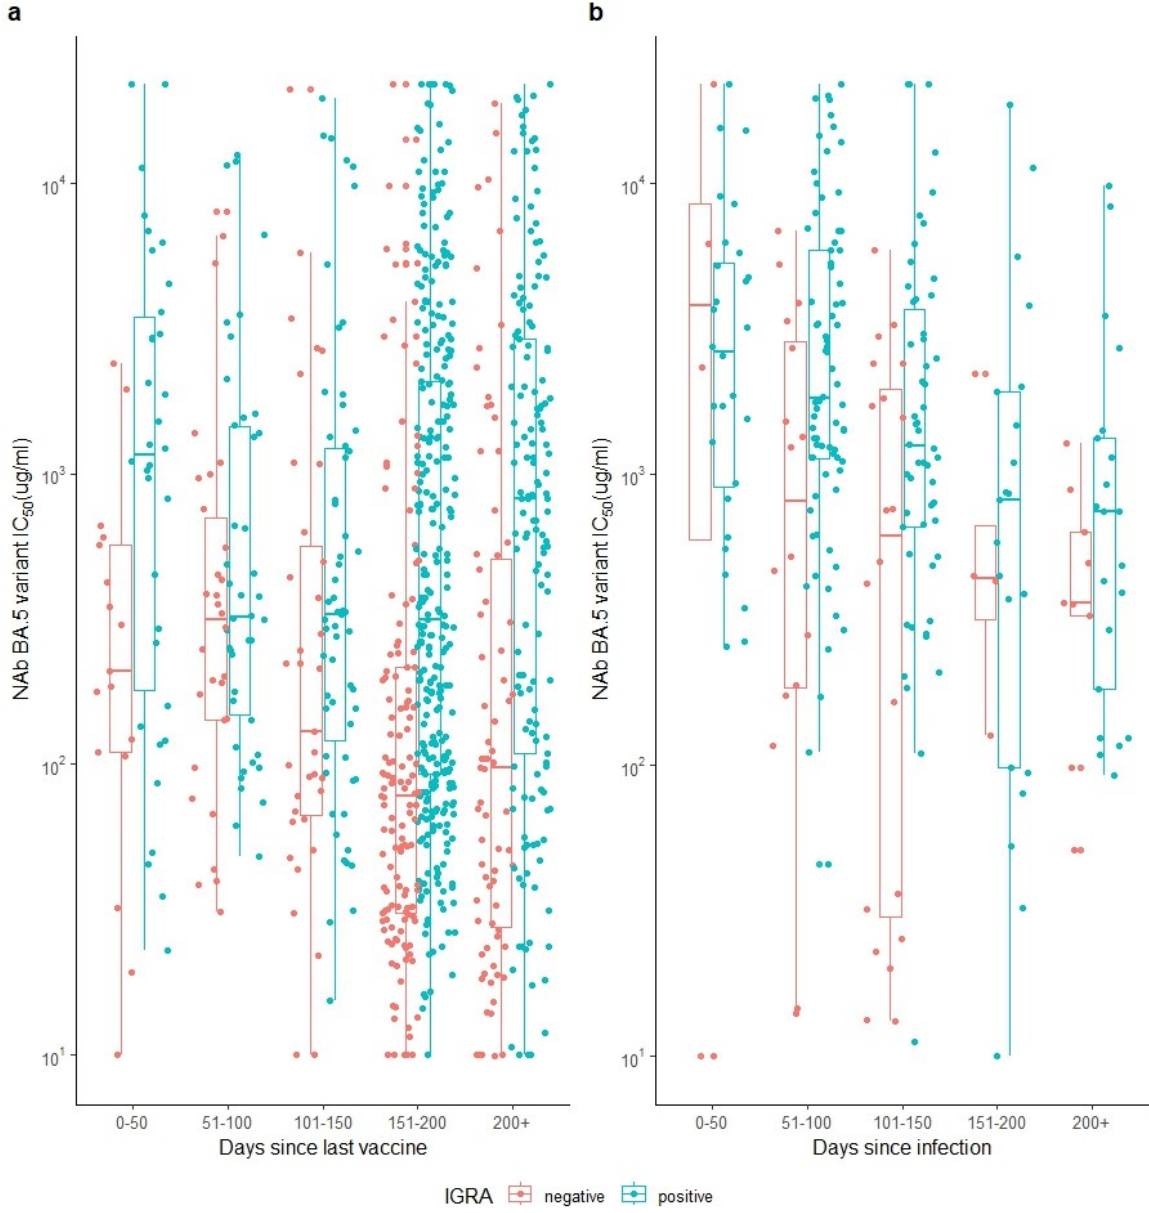

**Supplementary Figure 3:** Weekly number of COVID 19 cases hospitalized, cumulated over all age groups in Germany  
([https://www.rki.de/DE/Content/InfAZ/N/Neuartiges\\_Coronavirus/Daten/Klinische\\_Aspekte.xlsx?\\_\\_blob=publicationFile](https://www.rki.de/DE/Content/InfAZ/N/Neuartiges_Coronavirus/Daten/Klinische_Aspekte.xlsx?__blob=publicationFile))

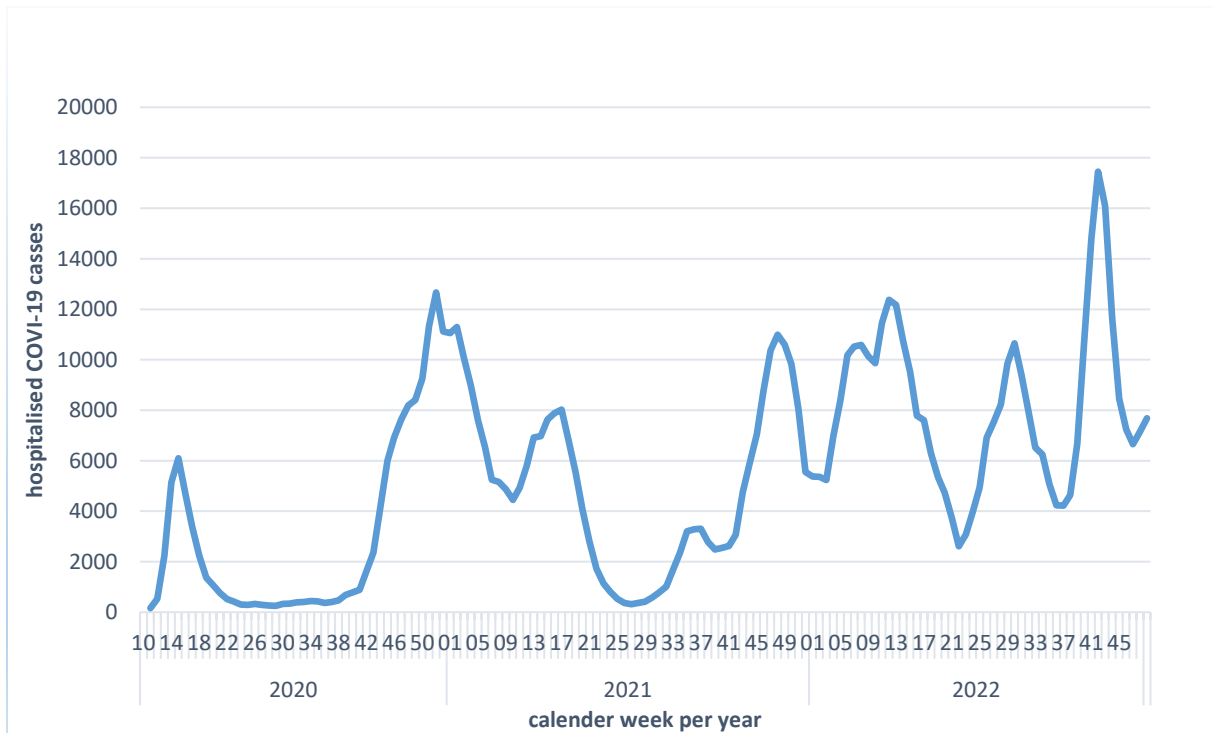

Supplement: Supplementary file [file media-1.pdf]
